# Supplementary material for: An elaborate balance between water transport and heat localization: a phoenix-tail skirt inspired solar evaporator
Source: Royal Society of Chemistry journal article supplement (doi:10.1039/d5ta01259g), 2025-01-01
Supplement: d5ta01259g1.pdf [file d5ta01259g1.pdf]

## Supporting Information

# An elaborate balance between water transport and heat localization: phoenix-tail skirt inspired solar evaporator

Yuhan Lin<sup>a,\*</sup>, Jie Feng<sup>a</sup>, Junjie Li<sup>a</sup>, Qiang Wang<sup>a</sup>, Yi He<sup>a</sup>, Bo Sheng<sup>b</sup>, Chuanyi Wang

<sup>a,\*</sup>

<sup>a</sup> *School of Environmental Science and Engineering, Shaanxi University of Science and Technology, Xi'an 710021, P. R. China*

<sup>b</sup> *National & Local Joint Engineering Research Center for Mineral Salt Deep Utilization, Huaiyin Institute of Technology, Huaian 223003, P. R. China*

\*Corresponding Authors.

E-mail addresses: linyuhan1006@sust.edu.cn (Y. Lin), wangchuanyi@sust.edu.cn (C. Wang).

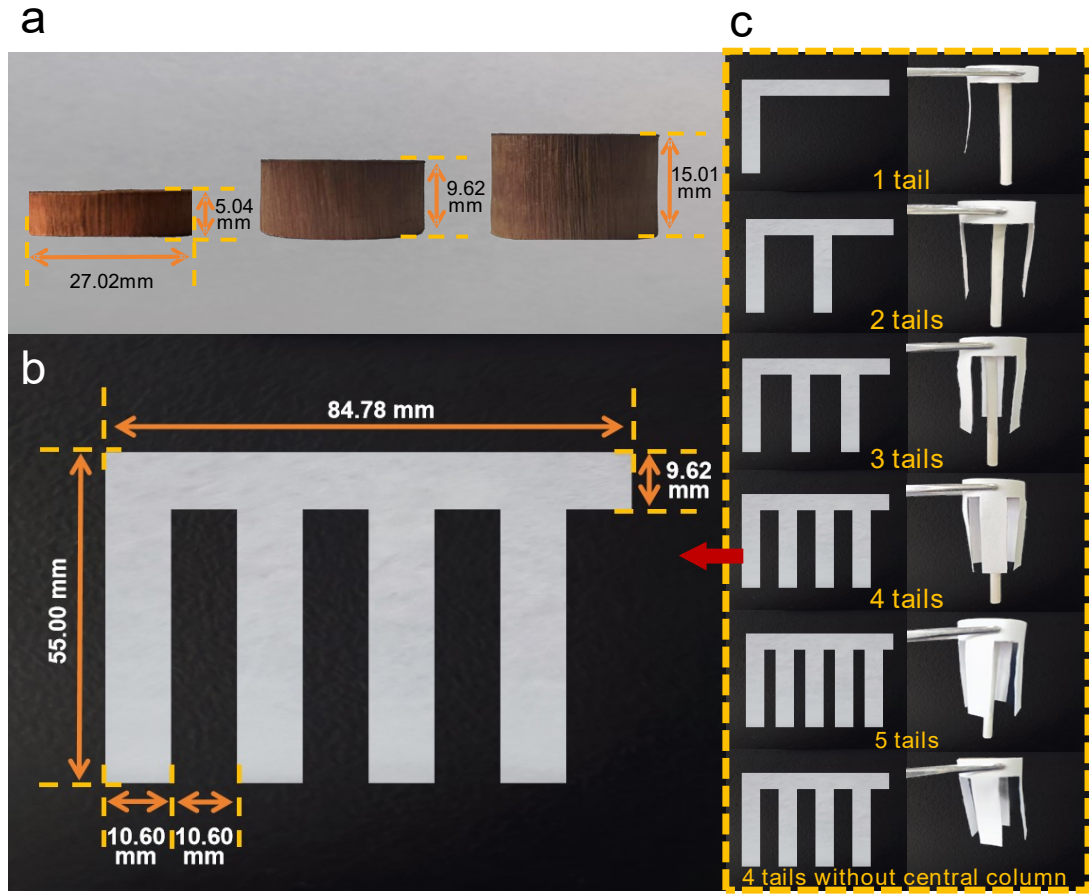

**Fig. S1.** Digital photos of (a) Nb<sub>4</sub>N<sub>5</sub>-CW with different thicknesses. (b) air-laid paper with the four-tail structure, and (c) Nb<sub>4</sub>N<sub>5</sub>-based phoenix-tail skirt-like evaporators with different structures.

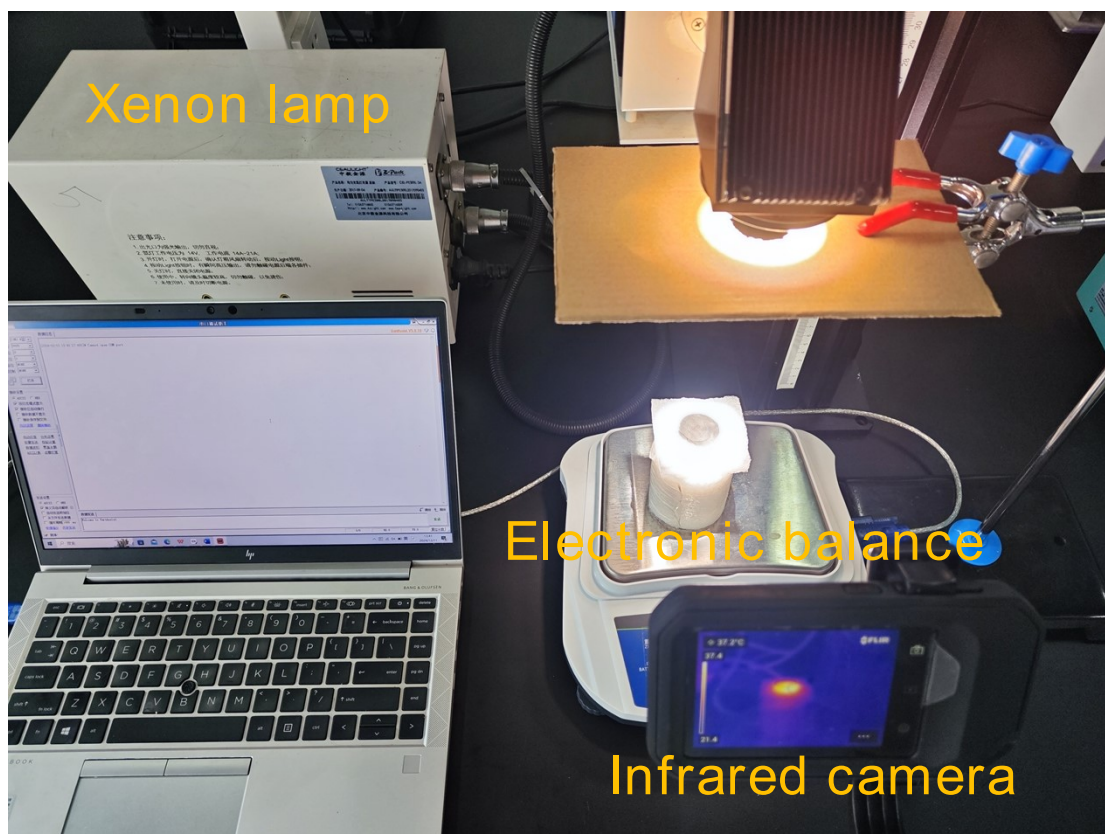

**Fig. S2.** Photo of the solar interfacial water evaporation system.

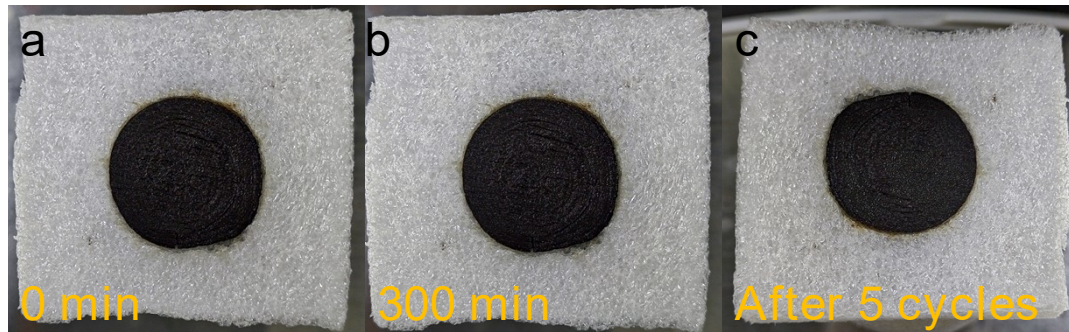

**Fig. S3.** Photos of the evaporator surface showing the absence of salt accumulation. (a) Before the evaporation test. (b) After the 5-h evaporation test. (c) After the cyclic test.

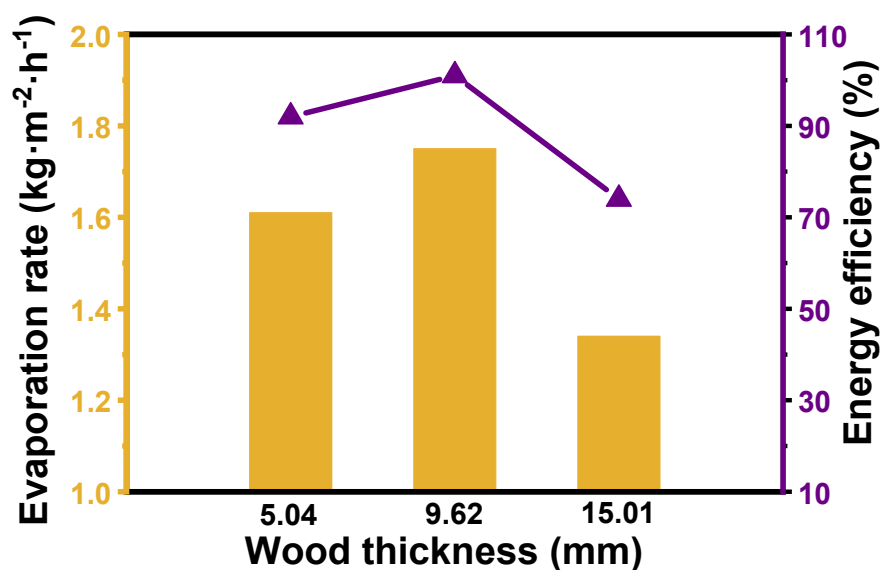

**Fig. S4.** Evaporation performances of artificial seawater (3.5 wt% NaCl) under 1.0 sun irradiation over the evaporators with different thicknesses.

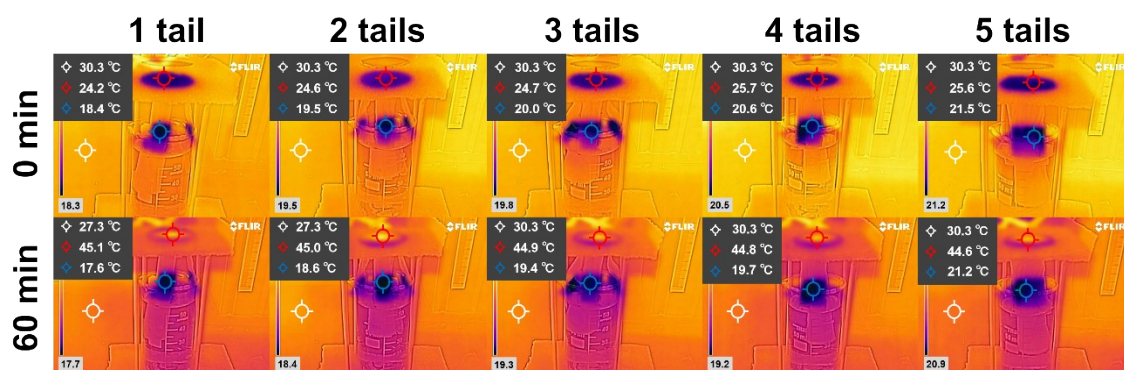

**Fig. S5.** The temperature distributions of evaporators with 1, 2, 3, 4, 5 tails respectively and a central column before irradiation and after 1.0 sun irradiation for 1 h.

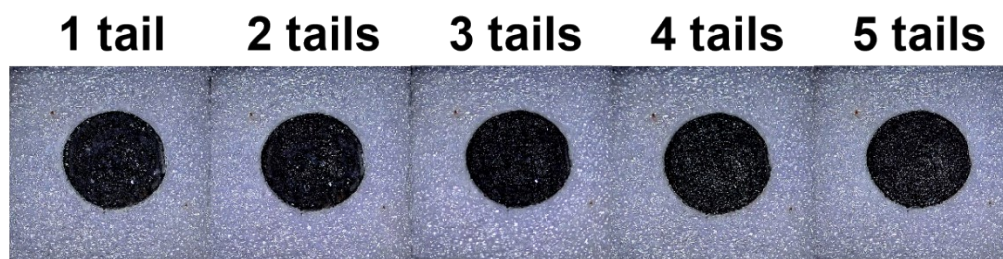

**Fig. S6.** Photos of the top surfaces of evaporators with different tail numbers, respectively, after the same 24-h evaporation.

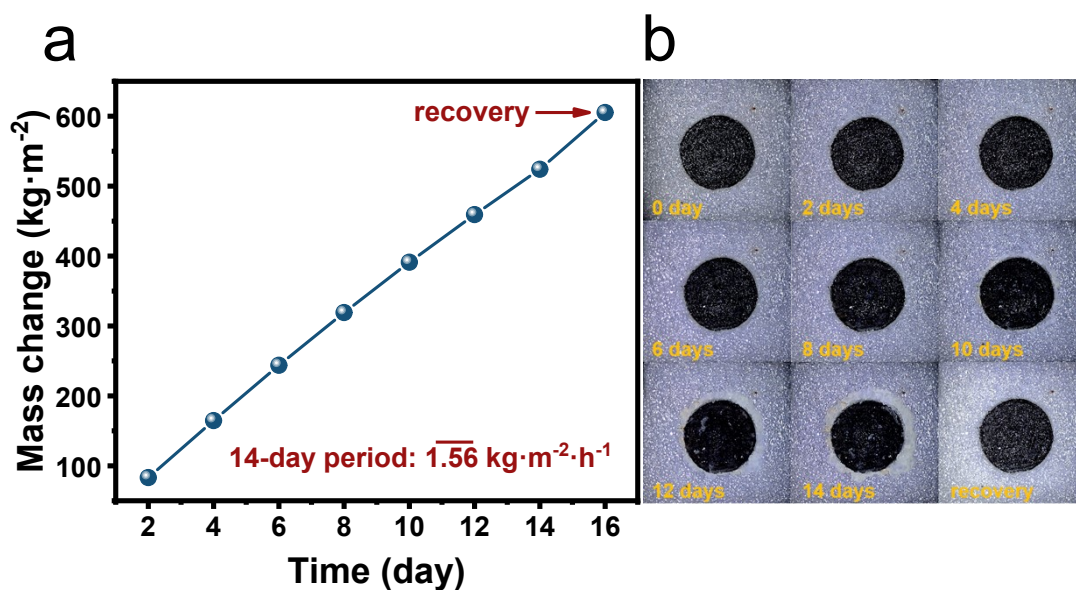

**Fig. S7.** A two-week evaporation performance test of 3.5 wt% NaCl solution over the Nb<sub>4</sub>N<sub>5</sub>-based phoenix-tail skirt-like evaporator with 4 tails and a central column under 1.0 sun irradiation. (a) Mass changes. (b) Salt precipitation situations.

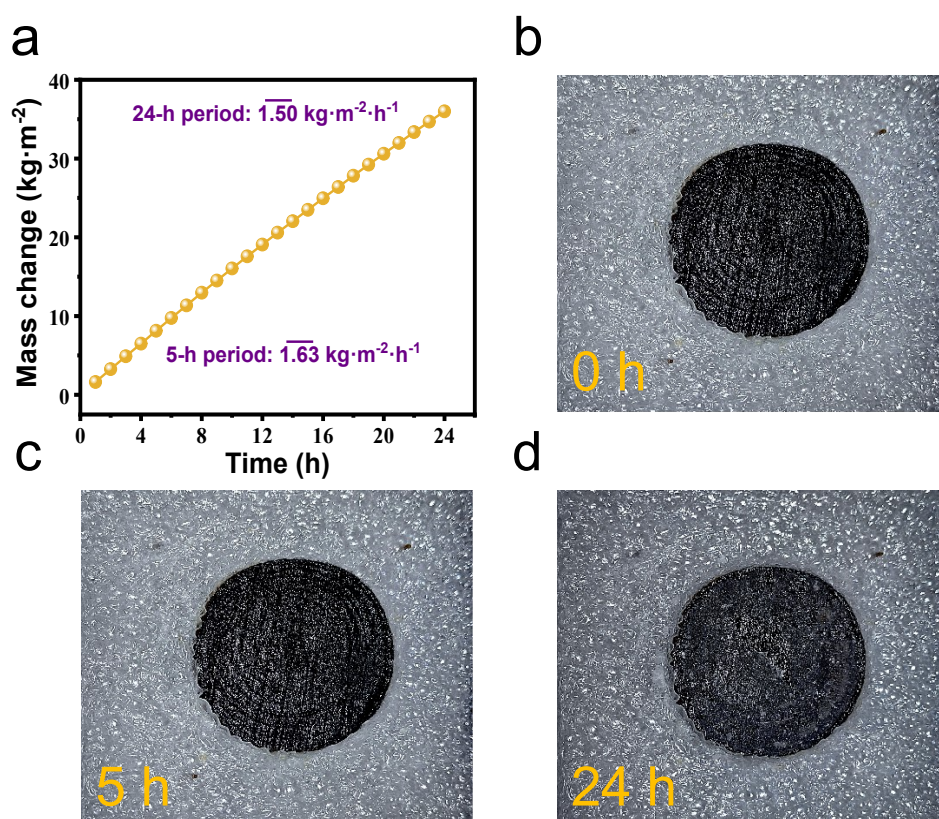

**Fig. S8.** Water evaporation test of 10 wt% NaCl solution over the Nb<sub>4</sub>N<sub>5</sub>-based phoenix-tail skirt-like evaporator with 4 tails and a central column under 1.0 sun irradiation. (a) Mass change during the 24-h evaporation. (b-d) Salt precipitation situations before the evaporation, after the 5-h evaporation, after the 24-h evaporation.
